# Supplementary material for: Eriocheir sinensis feminization-1c (Fem-1c) and Its Predicted miRNAs Involved in Sexual Development and Regulation
Source: Animals (Basel). 2023 May 30;13(11):1813. doi: 10.3390/ani13111813 (PMC10251896; doi:10.3390/ani13111813)
Supplement: Supplementary file 1 [file animals-13-01813-s001.zip]

Archive with 4 entries (4 files):
- Figures S1-S3.pdf
- Table S1.xlsx
- Table S2.xlsx
- Table S3.xlsx
