# Supplementary material for: Eriocheir sinensis feminization-1c (Fem-1c) and Its Predicted miRNAs Involved in Sexual Development and Regulation
Source: Animals (Basel). 2023 May 30;13(11):1813. doi: 10.3390/ani13111813 (PMC10251896; doi:10.3390/ani13111813)
Supplement: Supplementary file 1 [file animals-13-01813-s001.zip › Figures S1-S3.pdf]

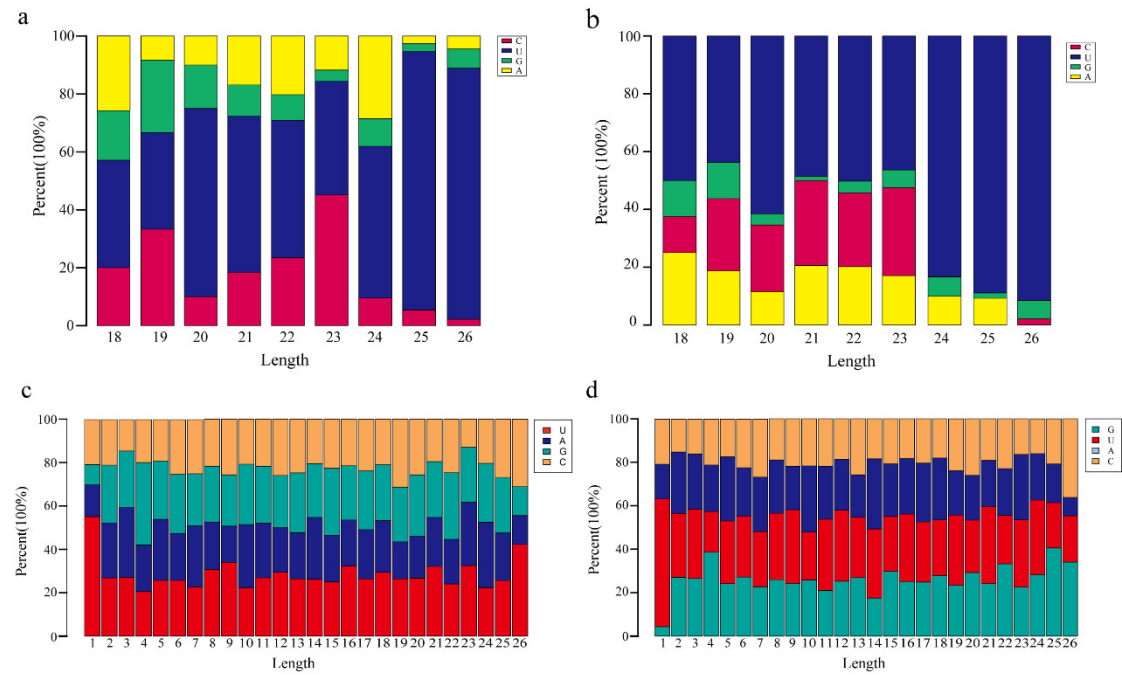

**Figure S1. The nucleotide bias of known miRNAs at first and each position in female and male crabs.** (a) and (b) The nucleotide bias of miRNAs at the first position in female and male crabs. The X-axis represented the base position of miRNA, while the Y-axis represented the percentage of A/U/C/G bases in the miRNA at the first position. (c) and (d) The nucleotide bias of miRNAs from female and male crabs at each position. The X-axis represented the base position of the miRNA, while the Y-axis represented the percentage of A/U/C/G bases in the miRNA at each position.

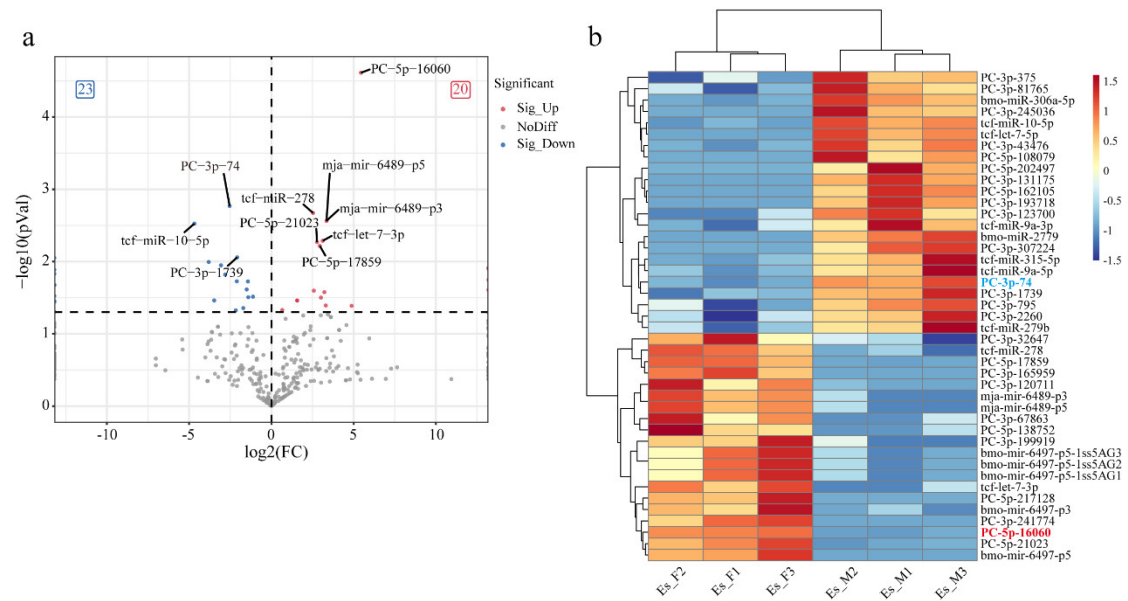

**Figure S2. Differential miRNAs (DEMs) expression in *E. sinensis* female and male reproductive systems.** (a) The volcano map of DEMs in females versus males. The X-axis represented the  $\log_2$  (fold change) in the miRNA expression between female and male crabs. In contrast, the statistical significance of changes in miRNA expression was presented at the Y-axis. Individual miRNAs were represented by the scatter pointed in the graph, and the grey dots each indicated no significant difference. The red dots indicated significantly up-regulated differential miRNAs, while the blue dots represented significantly down-regulated differential miRNAs. (b) A heat map diagram depicting the differentially expressed miRNAs in the female and male reproductive systems of *E. sinensis*. The color indicates that the  $p$ -value ranged from high (red) to low (blue).

a

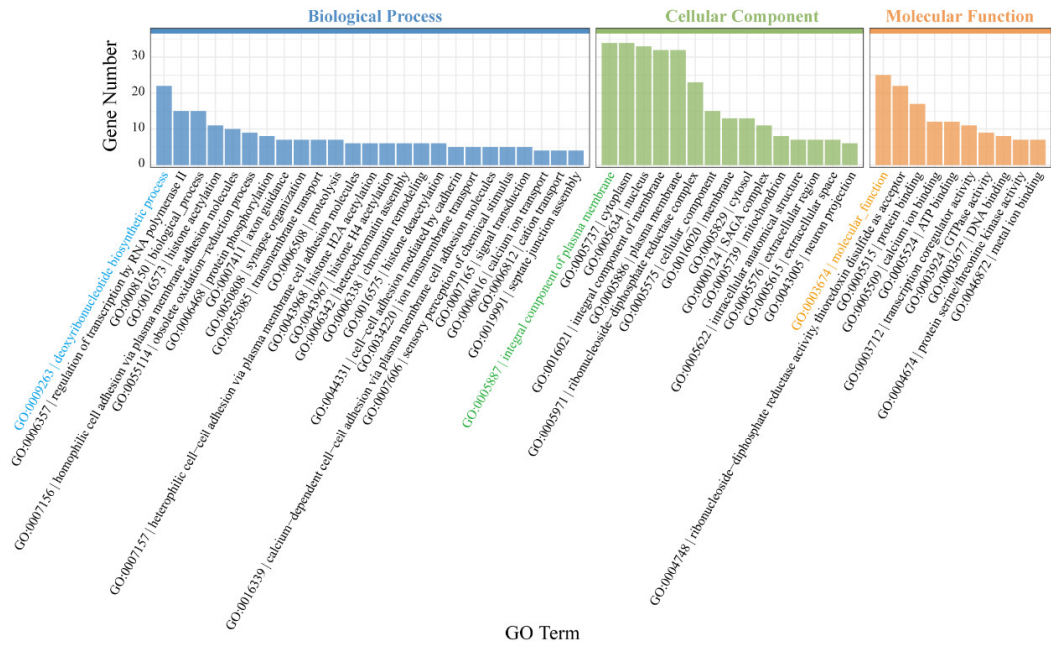

b

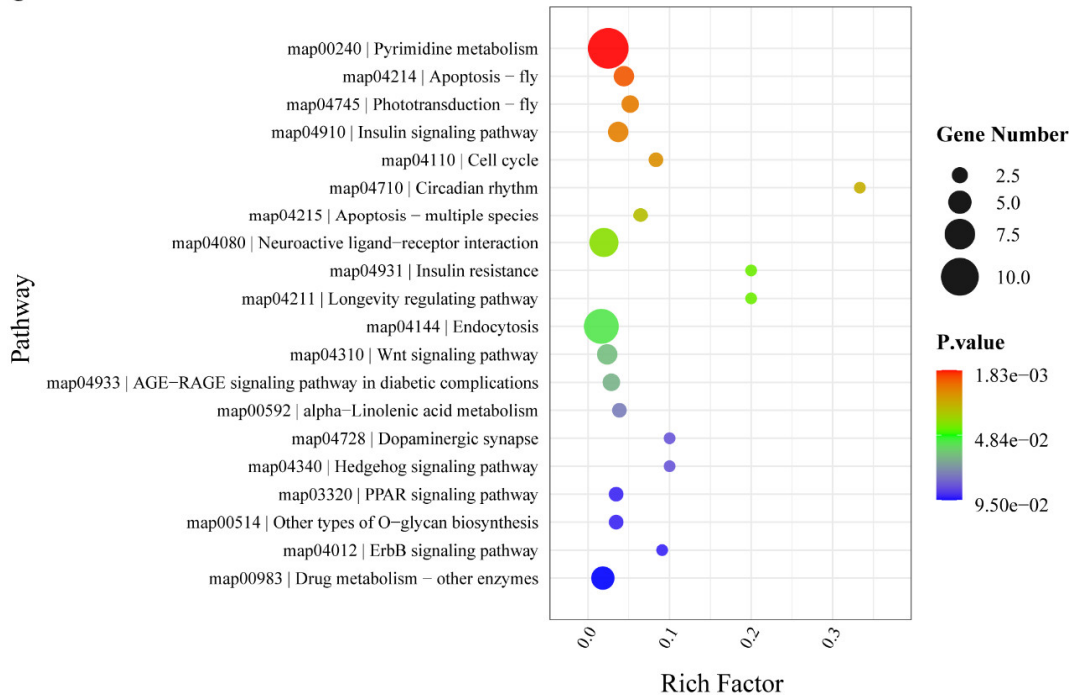

**Figure S3. GO and KEGG classification for predicted target genes of DEMs. (a)** The GO term for the next level of the three major classes of GO in the abscissa. The number of candidate target genes annotated to the term (including the sub-term of the term) was represented on the Y-axis. **(b)** Summary of KEGG pathway enrichment for predicted target genes of DEMs. The Y-axis represented the name of the pathway, while the X-axis represented the Rich factor. The number of candidate target genes in the pathway was indicated by the size of the point, and the color of the point corresponded to a different *p*-value range.
