# Supplementary material for: Eriocheir sinensis feminization-1c (Fem-1c) and Its Predicted miRNAs Involved in Sexual Development and Regulation
Source: Animals (Basel). 2023 May 30;13(11):1813. doi: 10.3390/ani13111813 (PMC10251896; doi:10.3390/ani13111813)
Supplement: Supplementary file 1 [file animals-13-01813-s001.zip › Table S1.xlsx]

## Sheet: Sheet1
Table S1 Overview of miRNA-seq data
		Es_F1	% of Total	Es_F2	% of Total	Es_F3	% of Total	Es_M1	% of Total	Es_M2	% of Total	Es_M3	% of Total
Raw reads		12420587	100	9426271	100	11417684	100	11855883	100	12475976	100	10131902	100
3ADT&length filter		2600246	0.20935	1366242	0.14494	2348331	0.205675	486514	0.0410357	389075	0.0311859	1460602	0.144159
Junk reads		243807	0.0196293	151188	0.016039	603037	0.0528161	22239	0.00187578	22320	0.00178904	27344	0.0026988
Clean reads		9576534	0.771021	7908841	0.839021	8466316	0.741509	11347130	0.957089	12064581	0.967025	8643956	0.853142
Rfam	total	354379	0.0285	91149	0.97	277923	2.43	29641	0.25	31382	0.25	18056	0.18
	rRNA	29454	0.0024	9233	0.1	67854	0.59	12460	0.11	10668	0.09	9606	0.09
	tRNA	84101	0.0068	56514	0.6	94336	0.83	8163	0.07	5713	0.05	5750	0.06
	snoRNA	5583	0.0004	1995	0.02	6729	0.06	4880	0.04	8358	0.07	1112	0.01
	snRNA	78014	0.0063	2537	0.03	36742	0.32	1914	0.02	3475	0.03	457	0
	other Rfam RNA	157227	0.0127	20870	0.22	72262	0.63	2224	0.02	3168	0.03	1131	0.01
mRNA		5228338	0.4209	4398415	0.4666	4388866	0.3844	6998216	0.5903	7942704	0.6366	4406551	0.4349
Repeats		243268	0.0196	32438	0.0034	108646	0.0095	29814	0.0025	30748	0.0025	20139	0.002
valid reads		4254686	0.3426	3458284	0.3669	3921661	0.3435	4331627	0.3654	4106721	0.3292	4224016	0.4169
3ADT&length filter: reads removed due to 3ADT not found and length with <18 nt and >25 nt were removed(for plants); length with<18 and >26 were remove(for animals).
Junk reads:Junk: >=2N, >=7A, >=8C, >=6G, >=7T, >=10Dimer, >=6Trimer, or >=5Tetramer.
