# Supplementary material for: Eriocheir sinensis feminization-1c (Fem-1c) and Its Predicted miRNAs Involved in Sexual Development and Regulation
Source: Animals (Basel). 2023 May 30;13(11):1813. doi: 10.3390/ani13111813 (PMC10251896; doi:10.3390/ani13111813)
Supplement: Supplementary file 1 [file animals-13-01813-s001.zip › Table S2.xlsx]

## Sheet: Sheet1
Table S2 The DE miRNAs between female and male reproduction tissues of E. sinensis
Index	miR_name	miR_seq	fold_change(female(mean)/male(mean))	log2(fold_change)	pvalue(t_test)	female/F_1(norm)	female/F_2(norm)	female/F_3(norm)	male/M_1(norm)	male/M_2(norm)	male/M_3(norm)	Expression level
down
1	PC-3p-74	TGACTAGAGATTCACACTCAT	0.172197	-2.53787	0.00170224	1234.4	2614.83	2249.93	10731.2	11314.2	13374.3	high
2	tcf-miR-10-5p	TACCCTGTAGATCCGAATTTGTG	0.038948	-4.68231	0.00298749	13.2171	0	3.26267	123.937	161.487	137.698	middle
3	PC-3p-1739	TAGCACCATGTGAATTCAGTACA	0.236757	-2.07852	0.00872967	444.575	176.572	420.231	1336.04	1272.39	1790.08	high
4	tcf-let-7-5p	TGAGGTAGTAGGTTGTGTGGTT	-inf	-inf	0.00889018	0	0	0	82.1398	113.899	95.2169	middle
5	bmo-miR-306a-5p	TCAGGTACTGTGTGACTCTG	0.0713584	-3.80877	0.0101303	350.854	1054.24	1156.29	11504.7	14326.3	10063.7	high
6	PC-3p-123700	TGACTGAGTCAAGGGTTTTGTG	0.119861	-3.06057	0.0112551	0	0	6.52533	22.5339	18.7231	13.1839	middle
7	bmo-miR-2779	TTCCGGCTCGAAGGACCA	-inf	-inf	0.0129918	0	0	0	10.1766	7.80129	11.719	middle
8	PC-3p-131175	TTCAGGGCCTCGTATTTACCGG	-inf	-inf	0.0147852	0	0	0	20.3532	14.0423	14.6488	middle
9	PC-3p-43476	AAGACCAGCAACCTGATACTC	0.142551	-2.81045	0.0151547	3.60466	7.78996	7.8304	34.8912	53.8289	46.1436	middle
10	PC-3p-81765	CAACGGTTGTGGAGTACCTTC	0.233341	-2.09949	0.0187456	0	11.6849	6.52533	23.9877	33.5455	20.5083	middle
11	PC-3p-375	GCTCTCCTGTAAGGATACTCTT	0.372585	-1.42436	0.0188224	1449.07	451.817	768.684	2092.75	2889.6	2182.66	high
12	PC-5p-162105	TGTGCTGGTACTAATGAGTCTC	-inf	-inf	0.0209463	0	0	0	6.54211	3.90064	5.12706	low
13	PC-3p-193718	AGGTAGAATGAAGTGGACTGTG	-inf	-inf	0.021296	0	0	0	10.1766	6.24103	7.32438	middle
14	PC-3p-795	CTCGTCTTGAAATGCTTTCCA	0.353384	-1.50069	0.0243014	202.662	973.745	535.077	1644.98	1383.17	1814.98	high
15	PC-3p-307224	CACCTGTGTATATAAGGACCCTG	-inf	-inf	0.0298241	0	0	0	9.44971	5.4609	10.2541	middle
16	tcf-miR-9a-3p	ATAAAGCTAGATTACCAAAGT	0.461092	-1.11687	0.0306484	12.0155	16.8782	23.4912	47.2485	31.2052	35.157	middle
17	PC-3p-2260	TGACTAGATCTACACTCATCAA	0.378192	-1.40281	0.031107	56.0725	297.317	310.606	525.549	497.722	732.438	middle
18	tcf-miR-315-5p	TTTTGATTGTTGCTCAGAAGG	0.0897981	-3.47717	0.0344582	100.129	302.51	615.991	3398.26	2800.66	5144.64	high
19	PC-3p-245036	TTCATTCGTATCAACACACAGC	-inf	-inf	0.0350525	0	0	0	9.44971	15.6026	8.78925	middle
20	PC-5p-108079	TGGTCTTGTATGTTGGAACGCA	-inf	-inf	0.0362895	0	0	0	13.8111	27.3045	19.0434	middle
21	tcf-miR-279b	TGACTAGATCCATACTCATCT	0.305943	-1.70867	0.0440072	287.572	1563.83	1152.37	2764.77	2563.5	4489.84	high
22	tcf-miR-9a-5p	TCTTTGGTGATCTAGCTGTATG	0.223095	-2.16427	0.047274	1470.7	3205.57	2739.33	9605.27	8424.61	15209.8	high
23	PC-5p-202497	TTCTTGTAAGTGTATTTCCTCG	-inf	-inf	0.0495636	0	0	0	6.90556	3.12052	4.39463	low
up
1	PC-5p-16060_375	TCGATCCCCGGCACCTCCACCA	43.67	5.44857	2.44281e-05	237.107	229.804	249.268	0	4.68077	11.719	middle
2	tcf-miR-278	TCGGTGGGATTCTCGTCCGTTT	5.80096	2.53629	0.00212868	286.771	303.808	227.082	82.1398	51.4885	7.32438	middle
3	mja-mir-6489-p3	CGGACTGGCGCTCTTGGA	10.215	3.35262	0.00273215	5.60725	7.78996	6.52533	0	1.95032	0	low
4	mja-mir-6489-p5	CGGACTGGCGCTCTTGGA	10.215	3.35262	0.00273215	5.60725	7.78996	6.52533	0	1.95032	0	low
5	tcf-let-7-3p	CTGTACAACTTGCTAACTTTCC	8.69556	3.12028	0.00516528	16.8217	22.0715	24.7963	0	0	7.32438	middle
6	PC-5p-21023	GGTGGAAAGAGATTCAGTCGCA	6.85194	2.77651	0.00537523	265.944	233.699	307.996	39.9795	28.0846	49.8058	middle
7	PC-5p-17859	GATGGGTGTGTCTCTGGTGCAT	7.70897	2.94654	0.00607145	252.326	257.069	204.895	28.3491	33.5455	30.7624	middle
8	bmo-mir-6497-p5	AACTTCGGGATAAGGATTGGCTCTG	inf	inf	0.0121934	6.8088	6.49163	9.13546	0	0	0	low
9	PC-3p-165959	CCTAACCCCACTGCGAACCTCC	inf	inf	0.0125446	13.6176	11.6849	9.13546	0	0	0	middle
10	PC-3p-241774	CTCCATGCCCCTCCCCTCCTCC	inf	inf	0.0179672	9.61243	6.49163	10.4405	0	0	0	middle
11	PC-5p-217128	GACGAAGGGTACGACCGAGAGCAAG	inf	inf	0.0246177	7.20932	7.78996	11.7456	0	0	0	middle
12	PC-3p-199919	ACGTTGTCCAGTGTCGGGGTAT	5.98374	2.58105	0.0252962	3.20414	3.24582	5.22026	0	1.95032	0	low
13	bmo-mir-6497-p3	GATTGGCTCTGAGGATCGG	9.33597	3.2228	0.0264938	20.0259	23.3699	35.8893	6.54211	1.95032	0	middle
14	PC-3p-67863	TGGGAAGACCTCTCGTATGCAATGCC	8.09083	3.01629	0.0315402	12.4161	26.6157	20.2285	0	0	7.32438	middle
15	bmo-mir-6497-p5_1ss5AG_2	TCGGGATAAGGATTGGCTCTGA	2.96553	1.56829	0.0345916	24.8321	16.2291	28.0589	5.45176	10.5317	7.32438	middle
16	bmo-mir-6497-p5_1ss5AG_1	TCGGGATAAGGATTGGCTCTG	2.96553	1.56829	0.0345916	24.8321	16.2291	28.0589	5.45176	10.5317	7.32438	middle
17	bmo-mir-6497-p5_1ss5AG_3	TCGGGATAAGGATTGGCTCTGAGGA	2.96553	1.56829	0.0345916	24.8321	16.2291	28.0589	5.45176	10.5317	7.32438	middle
18	PC-5p-138752	TGATATATGGGCAAAATTTGAGACAC	9.90536	3.30821	0.0405279	19.2249	35.0548	18.2709	0	0	7.32438	middle
19	PC-3p-120711	TGTGGTTGAGCAAAAAGGGATGATAC	29.4103	4.87825	0.0409802	47.2611	102.568	79.609	0	7.80129	0	middle
20	PC-3p-32647	ATATAGCTAGAGCACCATGGGG	1.58276	0.66244	0.0467557	125.763	105.164	90.0496	73.417	79.5731	49.8058	middle
