# Supplementary material for: Eriocheir sinensis feminization-1c (Fem-1c) and Its Predicted miRNAs Involved in Sexual Development and Regulation
Source: Animals (Basel). 2023 May 30;13(11):1813. doi: 10.3390/ani13111813 (PMC10251896; doi:10.3390/ani13111813)
Supplement: Supplementary file 1 [file animals-13-01813-s001.zip › Table S3.xlsx]

## Sheet: Sheet1
Table S3 The miRNAs targeted to 3'UTR of EsFem-1c
Number	miR Name	position	mfe	heteroduplex
A	tcf-let-7-3p	48	-21.5 kcal/mol	Fem-1c 5' A A UG U 3'
				GAGGUUA GCA UGUACA
				UUUCAAU CGU ACAUGU
				miRNA 3' CC UCA C 5'
B	bmo-mir-6497-p5	215	-28.0 kcal/mol	Fem-1c 5' C UCACCUG GAGGCC C 3'
				UCAGGGCUG CCUUA UCCUGA
				AGUCUCGGU GGAAU AGGGCU
				miRNA 3' UA 5'
C	tcf-miR-315-5p	456	-21.3 kcal/mol	Fem-1c 5' G C G 3'
				UGGGCAGCGG UCAGGG
				ACUCGUUGUU AGUUUU
				miRNA 3' GGAAG 5'
D	tcf-miR-7	647	-23.0 kcal/mol	Fem-1c 5' A U G C C 3'
				AGCAAC AAA CAUUG UCUUCUA
				UUGUUG UUU GUGAU AGAAGGU
				miRNA 3' U A C 5'
E	tcf-miR-281-3p	755	-14.4 kcal/mol	Fem-1c 5' G UU CA A C 3'
				AAGG AGU GC CAUGAU
				UUUC UCG CG GUACTG
				miRNA 3' A UC U AG U 5'
F	PC-3p-120711	1945	-27.5 kcal/mol	Fem-1c 5' U A AC GA U 3'
				GUAUCGUCC CU UGUUU AACCAU
				CAUAGUAGG GA ACGAG UUGGUG
				miRNA 3' AAA U 5'
G	tcf-let-7-5p	2384	-27.7 kcal/mol	Fem-1c 5' A CU AC A 3'
				AAUCAUAU G UUGCUGCC
				UUGGUGUG U GAUGAUGG
				miRNA 3' U GA AGU 5'
H	tca-bantam-3p	2815	-24.6 kcal/mol	Fem-1c 5' A CCAUGUUUGGGU A 3'
				CAGCU UUUGCAGUGAUC
				GUCGA AAGUGUUACUAG
				miRNA 3' UUA AGU 5'
